# Supplementary material for: Relationship between Patient Preferences, Attitudes to Treatment, Adherence, and Quality of Life in New Users of Teriflunomide
Source: Pharmaceuticals (Basel). 2022 Oct 11;15(10):1248. doi: 10.3390/ph15101248 (PMC9609230; doi:10.3390/ph15101248)

**Supplementary Table S1.** Previous DMT treatments

| Previous DMT treatment                    |    |        | No 2 <sup>nd</sup> line | 2 <sup>nd</sup> line before teriflunomide |                 |            |            |               |
|-------------------------------------------|----|--------|-------------------------|-------------------------------------------|-----------------|------------|------------|---------------|
| 1 <sup>st</sup> line before teriflunomide | N  | %      | N                       | Dacliz.                                   | Glatiram.       | I. beta 1a | I. beta 1b | Pegi. beta 1a |
| Daclizumab                                | 2  | 4.0%   | 2                       | -                                         | -               | -          | -          | -             |
| Glatiramer acetate                        | 17 | 34.0%  | 13                      | -                                         | -               | 3          | 1          | -             |
| Interferon beta 1a                        | 23 | 46.0%  | 17                      | -                                         | 4 <sup>1)</sup> | 1          | -          | 1             |
| Interferon beta 1b                        | 6  | 12.0%  | 3                       | -                                         | 1               | 2          | -          | -             |
| Peginterferon beta 1a                     | 2  | 4.0%   | 2                       | -                                         | -               | -          | -          | -             |
| Total                                     | 50 | 100.0% | 37                      | 0                                         | 5               | 6          | 1          | 1             |

<sup>1)</sup> One patient had 3 previous DMT treatments; 3<sup>rd</sup> line was interferon beta 1a.

**Supplementary Table S2.** Duration of previous DMT treatments

| Duration of previous DMT treatment (years) | N                | Mean | SD  | Median | Minimum | Maximum |
|--------------------------------------------|------------------|------|-----|--------|---------|---------|
| 1 <sup>st</sup> line before teriflunomide  | 48 <sup>1)</sup> | 4.7  | 3.3 | 4.5    | 0.0     | 12.6    |
| Daclizumab                                 | 2                | 5.9  | 0.9 | 5.9    | 5.3     | 6.6     |
| Glatiramer acetate                         | 17               | 5.0  | 3.9 | 4.7    | 0.1     | 11.9    |
| Interferon beta 1a                         | 21 <sup>1)</sup> | 4.4  | 3.2 | 3.9    | 0.2     | 12.6    |
| Interferon beta 1b                         | 6                | 5.5  | 2.6 | 6.7    | 1.0     | 7.8     |
| Peginterferon beta 1a                      | 2                | 1.0  | 1.4 | 1.0    | 0.0     | 2.1     |
| 2 <sup>nd</sup> line before teriflunomide  | 12               | 4.5  | 3.2 | 3.7    | 0.3     | 10.0    |
| Glatiramer acetate                         | 5                | 4.9  | 3.3 | 4.2    | 1.4     | 10.0    |
| Interferon beta 1a                         | 5                | 5.5  | 3.0 | 6.4    | 1.9     | 8.7     |
| Interferon beta 1b                         | 1                | 1.4  | -   | 1.4    | 1.4     | 1.4     |
| Peginterferon beta 1a                      | 1                | 0.3  | -   | 0.3    | 0.3     | 0.3     |
| 3 <sup>rd</sup> line before teriflunomide  | 1                | 3.4  | -   | 3.4    | 3.4     | 3.4     |
| Interferon beta 1a                         | 1                | 3.4  | -   | 3.4    | 3.4     | 3.4     |

<sup>1)</sup> Duration is missing for 2 patients.

**Supplementary Table S3.** The annualized relapse rate after 3 and 9 months of teriflunomide therapy divided by diagnosis and previous treatment<sup>1)</sup>

| Annualized relapse rate <sup>2)</sup>           | Baseline         | Visit 2          | Visit 3          |
|-------------------------------------------------|------------------|------------------|------------------|
| <b>Patients diagnosed with CIS (N = 68)</b>     | -                | -                | -                |
| ARR                                             | 0.78 (0.58–1.02) | 0.12 (0.05–0.23) | 0.15 (0.07–0.27) |
| ARR relative decrease                           | -                | 84.9%            | 81.1%            |
| <b>Patients diagnosed with RRMS (N = 37)</b>    | -                | -                | -                |
| ARR                                             | 0.62 (0.39–0.93) | 0.32 (0.17–0.57) | 0.16 (0.06–0.35) |
| ARR relative decrease                           | -                | 47.8%            | 73.9%            |
| <b>DMT naïve patients (N = 55)</b>              | -                | -                | -                |
| ARR                                             | 1.15 (0.88–1.47) | 0.22 (0.11–0.38) | 0.18 (0.09–0.33) |
| ARR relative decrease                           | -                | 81.0%            | 84.1%            |
| <b>DMT previously treated patients (N = 50)</b> | -                | -                | -                |
| ARR                                             | 0.26 (0.14–0.44) | 0.08 (0.02–0.20) | 0.12 (0.04–0.26) |
| ARR relative decrease                           | -                | 69.2%            | 53.8%            |

<sup>1)</sup> Baseline outcomes assessed the period of 12 months before the teriflunomide treatment, at visit 2, a period of 3 months was evaluated (between baseline and visit 2), and at visit 3, a period of 6 months was evaluated (between visit 2 and 3).

<sup>2)</sup> Values are % / mean (95% CI).

**Supplementary Table S4.** EDSS score distribution (0–10) per visit (N = 105)

| EDSS score | Visit 1 | Visit 2 | Visit 3 |
|------------|---------|---------|---------|
| 0          | 6.7%    | 8.6%    | 4.8%    |
| 1          | 15.2%   | 11.4%   | 13.3%   |
| 1.5        | 19.0%   | 21.0%   | 23.8%   |
| 2          | 25.7%   | 25.7%   | 24.8%   |
| 2.5        | 14.3%   | 15.2%   | 14.3%   |
| 3          | 10.5%   | 7.6%    | 7.6%    |
| 3.5        | 2.9%    | 3.8%    | 3.8%    |
| 4          | 3.8%    | 4.8%    | 4.8%    |
| 4.5        | 1.0%    | 0.0%    | 1.9%    |
| 5          | 1.0%    | 1.9%    | 1.0%    |

**Supplementary Table S5.** EDSS score after 3 and 9 months of teriflunomide therapy divided by diagnosis and previous treatment<sup>1)</sup>

| EDSS score <sup>2)</sup>                        | Baseline      | Visit 2       | Visit 3       |
|-------------------------------------------------|---------------|---------------|---------------|
| <b>Patients diagnosed with CIS (N = 68)</b>     | 1.75 (± 0.88) | 1.79 (± 0.95) | 1.88 (± 0.91) |
| EDSS                                            | -             | -             | -             |
| <b>Patients diagnosed with RRMS (N = 37)</b>    | 2.36 (± 1.06) | 2.30 (± 1.13) | 2.31 (± 1.08) |
| EDSS                                            | -             | -             | -             |
| <b>DMT naïve patients (N = 55)</b>              | 1.84 (± 0.76) | 1.83 (± 0.85) | 1.92 (± 0.77) |
| EDSS                                            | -             | -             | -             |
| <b>DMT previously treated patients (N = 50)</b> | 2.11 (± 1.18) | 2.13 (± 1.20) | 2.15 (± 1.18) |
| EDSS                                            | 1.75 (± 0.88) | 1.79 (± 0.95) | 1.88 (± 0.91) |

<sup>1)</sup> Baseline outcomes assessed the 12-month period before teriflunomide treatment, at visit 2, a period of 3 months was evaluated (between baseline and visit 2), and at visit 3 a period of 6 months was evaluated (between visit 2 and 3).

<sup>2)</sup> Values are mean (± SD).

**Supplementary Table S6.** The difference in quality of life (MSIS-29) between treatment naïve and previously treated patients at individual visits

| Quality of life (MSIS-29) <sup>1)</sup>     | Baseline      | Visit 2                     | Visit 3       |
|---------------------------------------------|---------------|-----------------------------|---------------|
| <b>Treatment naïve patients (N = 55)</b>    | 22.8 (± 19.5) | 20.2 (± 16.8)               | 21.4 (± 17.3) |
| <b>Previously treated patients (N = 49)</b> | 30.9 (± 20.8) | 31.5 (± 21.9) <sup>3)</sup> | 30.1 (± 21.7) |
| <b>p-value<sup>2)</sup></b>                 | <b>0.035</b>  | <b>0.006</b>                | <b>0.038</b>  |

<sup>1)</sup> Values are mean (± SD).

<sup>2)</sup> Two-sample Wilcoxon rank-sum (Mann-Whitney) test, the level of significance was 5% (significant values in bold).

<sup>3)</sup> N = 50.

**Supplementary Figure S1a.** Mean quality of life at individual visits (MSIS-29) (N = 104, N = 105, N = 104)

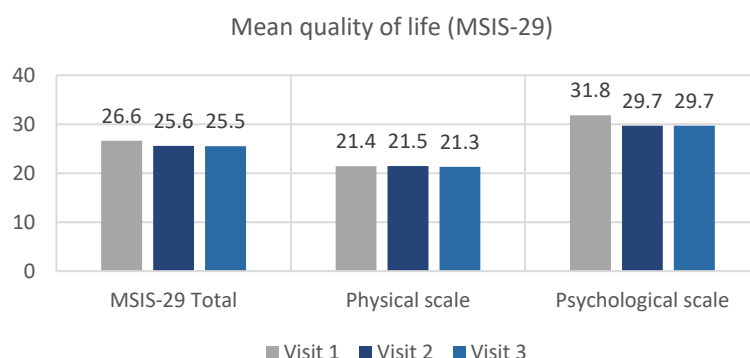

**Supplementary Figure S1b.** Mean quality of life (MSIS-29) at individual visits by previous treatment (naïve patients N = 55, N = 55, N = 55; previously treated patients N = 49, N = 50, N = 49)

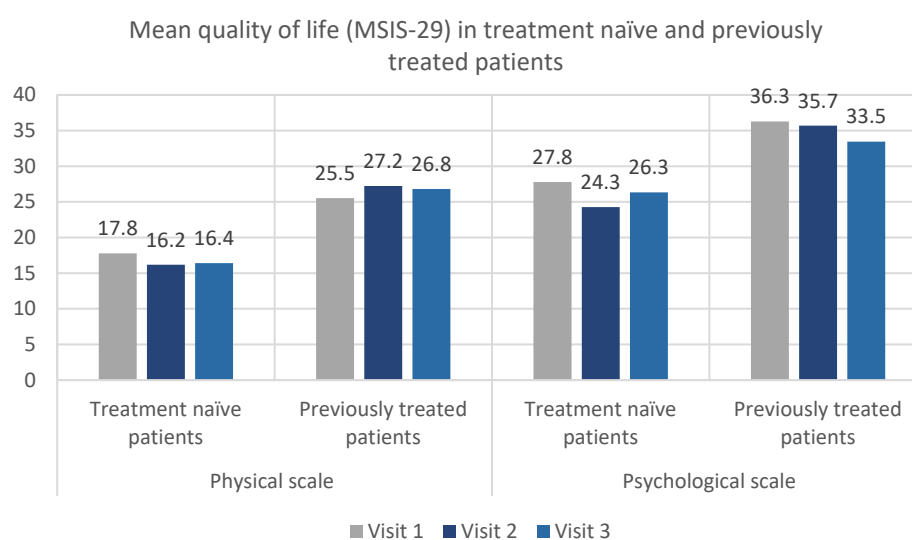

**Supplementary Figure S2.** Morisky Medication Adherence Scale (MMAS-8) (N = 103, N = 104)

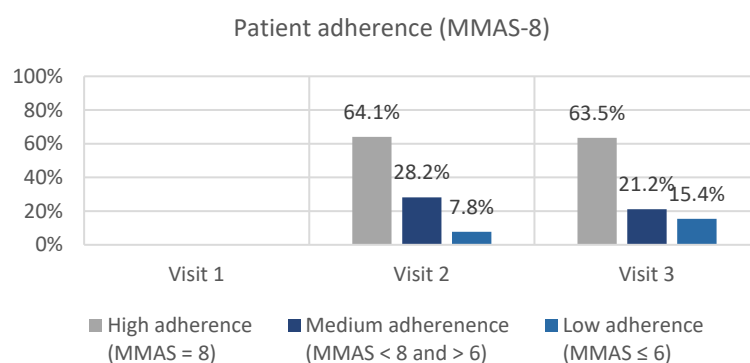

**Supplementary Figure S3.** Mean quality of life (MSIS-29) at Visit 3; higher MSIS-29 results mean worse quality of life (N = 103)

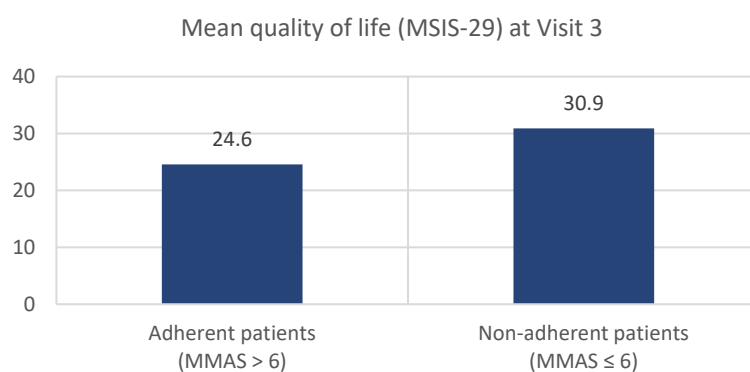

**Supplementary Figure S4.** Preferred usage form (peroral/injection) (N = 103, N = 104, N = 104)

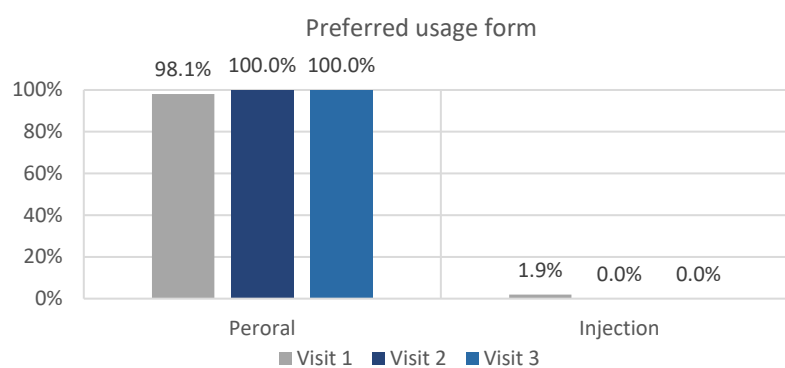

Supplement: Supplementary file 1 [file pharmaceuticals-15-01248-s001.zip › pharmaceuticals-1878067-supplementary.pdf]
